# Supplementary material for: Factors Associated with Depression and Anxiety in the Adult Population of Qatar after the First COVID-19 Wave: a Cross-sectional study
Source: Research Square preprint supplement (doi:10.21203/rs.3.rs-729213/v2), 2021-07-20
Supplement: Supplementary file 1 [file 8f2720faa804349ec0cd85a0.docx]

Highlights

- Cross-sectional online survey conducted in Qatar between July to December 2020
- The study was carried out after the first COVID-19 wave and before the second wave
- Factors associated with moderate-to-severe depression-anxiety included:
  - Arab ethnicity and never married status
  - History of psychiatric disorder and confirmed/suspected COVID-19 infection
  - Worries induced by frequent use of social media for COVID-related updates
  - Higher perceived loneliness and lower levels of religiosity
